# Supplementary material for: Atorvastatin calcium selectively kills thyroid cancer cells by inhibiting the prenylation of HRAS proteins
Source: Research Square preprint supplement (doi:10.21203/rs.3.rs-6629474/v1), 2025-06-09
Supplement: Supplementary file 1 [file 47a41872ff87fac7b1d00421.docx]

**Supplementary information for**

**Atorvastatin calcium** **selectively** **kills thyroid cancer cells by inhibiting** **the prenylation of HRAS proteins**

Rong Wang 1,2,3,*, Hexiang Li1,*, Yan Zhang1, Nana Liu2, Shengxiang Li2, Daxu Li4，Meiju Ji5, Qi Yang1🖂, and Peng Hou1🖂

**Running Title:** Atorvastatin calcium selectively kills thyroid cancer cells

*** Corresponding authors:**

**Qi Yang, Ph.D**

Department of Endocrinology and International Joint Research Center for Tumor Precision Medicine of Shaanxi Province, The First Affiliated Hospital of Xi’an Jiaotong University, Xi’an 710061, P.R. China

E-mail (Qi Yang): [yangqi2015@xjtu.edu.cn](mailto:yangqi2015@xjtu.edu.cn)

**Peng Hou, Ph.D**

Department of Endocrinology and International Joint Research Center for Tumor Precision Medicine of Shaanxi Province, The First Affiliated Hospital of Xi’an Jiaotong University, Xi’an 710061, P.R. China

E-mail (Peng Hou): [phou@xjtu.edu.cn](mailto:phou@xjtu.edu.cn).

**Supplementary Table 1**. Tissue origins and genetic alterations of different thyroid cancer cell lines [1]

| **Cell lines** | **Origins** | **Genetic alteration**  **of *BRAF*** | **Genetic alteration**  **of *RAS*** | **Genetic alteration**  **of *PIK3CA*** |
| --- | --- | --- | --- | --- |
| 8305C | ATC | *BRAF*V600E  (Heterozygous) | *NRAS* truncating (Heterozygous) | - |
| 8505C | ATC | *BRAF*V600E  (Homozygous) | - | - |
| IHH4 | ATC | *BRAF*V600E  (Heterozygous) | - | - |
| K1 | PTC | *BRAF*V600E  (Heterozygous) | - | *PIK3CA*E542K  (Heterozygous) |
| C643 | ATC | - | *HRAS*G13R  (Heterozygous) | - |
| HTori3 | - | Wild- type | Wild- type | Wild- type |

**Supplementary** **Table 2** Antibodies used in this study

| **Antibodies** | **Catalog#** | **Source** |
| --- | --- | --- |
| anti-p-AKTS473 | #4060 | Cell Signaling Technology |
| anti-p-AKTT308 | #13038 | Cell Signaling Technology |
| anti-t-AKT | BS1810 | Bioworld Technology |
| anti-p-ERK | #4695 | Cell Signaling Technology |
| anti-t-ERK | #9102 | Cell Signaling Technology |
| anti-HRAS | 18295-1-AP | Proteintech Group |
| anti-KRAS | 12063-1-AP | Proteintech Group |
| anti-NRAS | 10724-1-AP | Proteintech Group |
| anti-p110a | #4255 | Cell Signaling Technology |
| anti-β-Actin | M20011 | Abmart |
| anti-GAPDH | M20006 | Abmart |

**Supplementary** **Table 3** The primers used in this study

| **Genes** | | **Oligonucleotides (5’- 3’)** | **Application** |
| --- | --- | --- | --- |
| *HMGCR* | Forward | GCAATAGGTCTTGGTGGAGG | qRT-PCR |
| Reverse | TGGACTGGAAACGGATATAAAGG | qRT-PCR |
| *FDPS* | Forward | AGCCCTATTACCTGAACCTG | qRT-PCR |
| Reverse | GTCAAGGTAATCATCCTGAATCTG | qRT-PCR |
| *FNTA* | Forward | CCAATTATACAGTGTGGCATTTCC | qRT-PCR |
| Reverse | ACATACTGCAGCTCATTATCCC | qRT-PCR |
| *FNTB* | Forward | CTTCTCCGAGTTCTTTCACC | qRT-PCR |
| Reverse | CATCCAGACACTCATAGGCA | qRT-PCR |
| *RCE1* | Forward | ACTCCCTTCCTCACTTTGGAC | qRT-PCR |
| Reverse | GCCATGTTACCCAAGTTAAATCTC | qRT-PCR |
| *ICMT* | Forward | TCGCTACCAGATAGCCATCC | qRT-PCR |
| Reverse | CATGTACCAGCCAAAGTGACTC | qRT-PCR |
| *ZDHHC9* | Forward | CCCTTGTCAGGAGGAGACAG | qRT-PCR |
| Reverse | CAATTGCTAGCCCTGGAAGAC | qRT-PCR |
| *ZDHHC17* | Forward | CAGAATATCAAGGGCGAATCAG | qRT-PCR |
| Reverse | CCAACCAGCCAAATAACTAGGA | qRT-PCR |
| *ZDHHC18* | Forward | GGTCGCAATCGCTTCTACTG | qRT-PCR |
| Reverse | GGTAGGGACAGTCAAAGACGA | qRT-PCR |
| *GOGA7* | Forward | AGTCATATCTCGAAGGTTGTTTGG | qRT-PCR |
| Reverse | GGTAATTTCAATAACTCGCAGTCC | qRT-PCR |
| *ACTB* | Forward | CACCATTGGCAATGAGCGGTTC | qRT-PCR |
| Reverse | CACCATTGGCAATGAGCGGTTC | qRT-PCR |

**Supplementary figures**


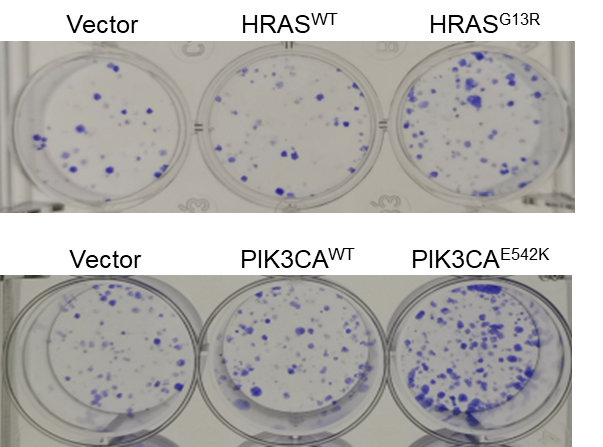
**Supplementary Fig. S1** The representative pictures of colony formation of 8505C cells exogenously expressing the indicated genes.

**Supplementary Fig. S2** The effects of ATO on murine liver and kidney *in vivo*. (**A**) The mice in Fig. 7 were sacrificed at the end of the experiment, and the liver and kidney tissues were paraffin embedded and sectioned for Hematoxylin and eosin (H&E) staining. Scale bar, 200 μm. (**B**) The serum of the mice underwent different treatments was collected before sacrifice and subjected to ALT and AST tests. Data were presented as mean ± SD.

**References**

1. Landa I, Pozdeyev N, Korch C, Marlow LA, Smallridge RC, Copland JA, et al. Comprehensive genetic characterization of human thyroid cancer cell lines: a validated panel for preclinical studies. Clin Cancer Res. 2019;25:3141-51.
