# Supplementary material for: Atorvastatin calcium selectively kills thyroid cancer cells by inhibiting the prenylation of HRAS proteins
Source: Research Square preprint supplement (doi:10.21203/rs.3.rs-6629474/v1), 2025-06-09
Supplement: Supplementary file 2 [file 89a98933266b51017f100412.xlsx]

## Sheet: 0
	Well	Fluor	Target	Content	Sample	Biological Set Name	Cq	Cq Mean	Cq Std. Dev	Starting Quantity (SQ)	Log Starting Quantity	SQ Mean	SQ Std. Dev	Set Point	Well Note
	F12	SYBR	18S	Unkn-24	ato		11.658	11.7446	0.0988288					60
	F10	SYBR	18S	Unkn-24	ato		11.7236	11.7446	0.0988288					60
	F11	SYBR	18S	Unkn-24	ato		11.8523	11.7446	0.0988288					60					18S	Unkn-24	ato	11.658
	H12	SYBR	18S	Unkn-32	ato+gsk		14.4349	14.6448	0.215262					60					18S	Unkn-24	ato	11.7236
	H11	SYBR	18S	Unkn-32	ato+gsk		14.6345	14.6448	0.215262					60					18S	Unkn-24	ato	11.8523
	H10	SYBR	18S	Unkn-32	ato+gsk		14.865	14.6448	0.215262					60					18S	Unkn-32	ato+gsk	14.4349
	E11	SYBR	18S	Unkn-20	con		11.5556	11.8731	0.282252					60					18S	Unkn-32	ato+gsk	14.6345
	E12	SYBR	18S	Unkn-20	con		11.9683	11.8731	0.282252					60					18S	Unkn-32	ato+gsk	14.865
	E10	SYBR	18S	Unkn-20	con		12.0955	11.8731	0.282252					60					18S	Unkn-20	con	11.5556
	G10	SYBR	18S	Unkn-28	gsk		11.3983	11.482	0.116614					60					18S	Unkn-20	con	11.9683
	G12	SYBR	18S	Unkn-28	gsk		11.4326	11.482	0.116614					60					18S	Unkn-20	con	12.0955
	G11	SYBR	18S	Unkn-28	gsk		11.6152	11.482	0.116614					60					18S	Unkn-28	gsk	11.3983
	F08	SYBR	ACTIN	Unkn-23	ato		18.2203	18.3133	0.0923561					60					18S	Unkn-28	gsk	11.4326
	F09	SYBR	ACTIN	Unkn-23	ato		18.3148	18.3133	0.0923561					60					18S	Unkn-28	gsk	11.6152
	F07	SYBR	ACTIN	Unkn-23	ato		18.405	18.3133	0.0923561					60
	H09	SYBR	ACTIN	Unkn-31	ato+gsk		18.9273	19.0032	0.0667334					60
	H08	SYBR	ACTIN	Unkn-31	ato+gsk		19.0298	19.0032	0.0667334					60
	H07	SYBR	ACTIN	Unkn-31	ato+gsk		19.0525	19.0032	0.0667334					60
	E08	SYBR	ACTIN	Unkn-19	con		17.4558	17.8367	0.332542					60
	E09	SYBR	ACTIN	Unkn-19	con		17.9847	17.8367	0.332542					60
	E07	SYBR	ACTIN	Unkn-19	con		18.0695	17.8367	0.332542					60
	G08	SYBR	ACTIN	Unkn-27	gsk		17.0015	17.2196	0.189547					60
	G09	SYBR	ACTIN	Unkn-27	gsk		17.3127	17.2196	0.189547					60
	G07	SYBR	ACTIN	Unkn-27	gsk		17.3446	17.2196	0.189547					60
	B01	SYBR	GOLGA7	Unkn-05	ato		22.6889	22.7919	0.0924036					60
	B03	SYBR	GOLGA7	Unkn-05	ato		22.819	22.7919	0.0924036					60
	B02	SYBR	GOLGA7	Unkn-05	ato		22.8677	22.7919	0.0924036					60
	D01	SYBR	GOLGA7	Unkn-13	ato+gsk		23.7731	24.1205	0.30148					60
	D03	SYBR	GOLGA7	Unkn-13	ato+gsk		24.2751	24.1205	0.30148					60
	D02	SYBR	GOLGA7	Unkn-13	ato+gsk		24.3134	24.1205	0.30148					60
	A01	SYBR	GOLGA7	Unkn-01	con		22.6097	22.6995	0.155511					60
	A02	SYBR	GOLGA7	Unkn-01	con		22.6097	22.6995	0.155511					60
	A03	SYBR	GOLGA7	Unkn-01	con		22.8791	22.6995	0.155511					60
	C02	SYBR	GOLGA7	Unkn-09	gsk		22.4054	22.621	0.224617					60
	C01	SYBR	GOLGA7	Unkn-09	gsk		22.6038	22.621	0.224617					60
	C03	SYBR	GOLGA7	Unkn-09	gsk		22.8536	22.621	0.224617					60
	F01	SYBR	LYPLA1	Unkn-21	ato		21.1079	21.2965	0.253827					60
	F02	SYBR	LYPLA1	Unkn-21	ato		21.1964	21.2965	0.253827					60
	F03	SYBR	LYPLA1	Unkn-21	ato		21.5851	21.2965	0.253827					60
	H01	SYBR	LYPLA1	Unkn-29	ato+gsk		22.8122	23.0074	0.331338					60
	H02	SYBR	LYPLA1	Unkn-29	ato+gsk		22.82	23.0074	0.331338					60
	H03	SYBR	LYPLA1	Unkn-29	ato+gsk		23.3899	23.0074	0.331338					60
	E01	SYBR	LYPLA1	Unkn-17	con		20.8685	20.9112	0.0489901					60
	E02	SYBR	LYPLA1	Unkn-17	con		20.9006	20.9112	0.0489901					60
	E03	SYBR	LYPLA1	Unkn-17	con		20.9647	20.9112	0.0489901					60
	G01	SYBR	LYPLA1	Unkn-25	gsk		20.9076	21.0029	0.0833927					60
	G02	SYBR	LYPLA1	Unkn-25	gsk		21.0389	21.0029	0.0833927					60
	G03	SYBR	LYPLA1	Unkn-25	gsk		21.0623	21.0029	0.0833927					60
	F04	SYBR	LYPLA2	Unkn-22	ato		24.3013	24.4574	0.135222					60
	F05	SYBR	LYPLA2	Unkn-22	ato		24.5309	24.4574	0.135222					60
	F06	SYBR	LYPLA2	Unkn-22	ato		24.5399	24.4574	0.135222					60
	H06	SYBR	LYPLA2	Unkn-30	ato+gsk		25.197	25.2251	0.0483823					60
	H04	SYBR	LYPLA2	Unkn-30	ato+gsk		25.1974	25.2251	0.0483823					60
	H05	SYBR	LYPLA2	Unkn-30	ato+gsk		25.281	25.2251	0.0483823					60
	E06	SYBR	LYPLA2	Unkn-18	con		23.9294	23.9667	0.0341211					60
	E05	SYBR	LYPLA2	Unkn-18	con		23.9741	23.9667	0.0341211					60
	E04	SYBR	LYPLA2	Unkn-18	con		23.9964	23.9667	0.0341211					60
	G06	SYBR	LYPLA2	Unkn-26	gsk		23.3679	23.6641	0.256519					60
	G05	SYBR	LYPLA2	Unkn-26	gsk		23.8106	23.6641	0.256519					60
	G04	SYBR	LYPLA2	Unkn-26	gsk		23.8139	23.6641	0.256519					60
	B08	SYBR	ZDHHC17	Unkn-07	ato		25.1212	25.1962	0.0780137					60
	B09	SYBR	ZDHHC17	Unkn-07	ato		25.1904	25.1962	0.0780137					60
	B07	SYBR	ZDHHC17	Unkn-07	ato		25.2769	25.1962	0.0780137					60
	D08	SYBR	ZDHHC17	Unkn-15	ato+gsk		27.0152	27.033	0.0218018					60
	D09	SYBR	ZDHHC17	Unkn-15	ato+gsk		27.0266	27.033	0.0218018					60
	D07	SYBR	ZDHHC17	Unkn-15	ato+gsk		27.0573	27.033	0.0218018					60
	A09	SYBR	ZDHHC17	Unkn-03	con		25.0662	25.1746	0.122324					60
	A07	SYBR	ZDHHC17	Unkn-03	con		25.1504	25.1746	0.122324					60
	A08	SYBR	ZDHHC17	Unkn-03	con		25.3073	25.1746	0.122324					60
	C09	SYBR	ZDHHC17	Unkn-11	gsk		24.8917	24.9485	0.0622002					60
	C07	SYBR	ZDHHC17	Unkn-11	gsk		24.9389	24.9485	0.0622002					60
	C08	SYBR	ZDHHC17	Unkn-11	gsk		25.015	24.9485	0.0622002					60
	B04	SYBR	ZDHHC18	Unkn-06	ato		25.3266	25.4506	0.148776					60
	B05	SYBR	ZDHHC18	Unkn-06	ato		25.4095	25.4506	0.148776					60
	B06	SYBR	ZDHHC18	Unkn-06	ato		25.6155	25.4506	0.148776					60
	D04	SYBR	ZDHHC18	Unkn-14	ato+gsk		28.4158	28.6206	0.204397					60
	D06	SYBR	ZDHHC18	Unkn-14	ato+gsk		28.6214	28.6206	0.204397					60
	D05	SYBR	ZDHHC18	Unkn-14	ato+gsk		28.8246	28.6206	0.204397					60
	A05	SYBR	ZDHHC18	Unkn-02	con		25.4949	25.5797	0.0985978					60
	A04	SYBR	ZDHHC18	Unkn-02	con		25.5564	25.5797	0.0985978					60
	A06	SYBR	ZDHHC18	Unkn-02	con		25.6879	25.5797	0.0985978					60
	C05	SYBR	ZDHHC18	Unkn-10	gsk		25.4752	25.581	0.159715					60
	C06	SYBR	ZDHHC18	Unkn-10	gsk		25.503	25.581	0.159715					60
	C04	SYBR	ZDHHC18	Unkn-10	gsk		25.7647	25.581	0.159715					60
	B10	SYBR	ZDHHC9	Unkn-08	ato		25.2493	25.2653	0.0213593					60
	B11	SYBR	ZDHHC9	Unkn-08	ato		25.2571	25.2653	0.0213593					60
	B12	SYBR	ZDHHC9	Unkn-08	ato		25.2896	25.2653	0.0213593					60
	D12	SYBR	ZDHHC9	Unkn-16	ato+gsk		25.8647	26.0863	0.358387					60
	D11	SYBR	ZDHHC9	Unkn-16	ato+gsk		25.8944	26.0863	0.358387					60
	D10	SYBR	ZDHHC9	Unkn-16	ato+gsk		26.4998	26.0863	0.358387					60
	A12	SYBR	ZDHHC9	Unkn-04	con		24.7585	24.9832	0.215225					60
	A10	SYBR	ZDHHC9	Unkn-04	con		25.0036	24.9832	0.215225					60
	A11	SYBR	ZDHHC9	Unkn-04	con		25.1875	24.9832	0.215225					60
	C12	SYBR	ZDHHC9	Unkn-12	gsk		24.3426	24.3931	0.0462993					60
	C11	SYBR	ZDHHC9	Unkn-12	gsk		24.4033	24.3931	0.0462993					60
	C10	SYBR	ZDHHC9	Unkn-12	gsk		24.4335	24.3931	0.0462993					60

## Sheet: Sheet1
GOLGA7	Unkn-05	ato	22.6889		ACTIN	Unkn-23	ato	18.2203		GOLGA7	Unkn-01	con	22.6995		ACTIN	Unkn-19	con	17.8367		-0.394151	0.394151	1.31417	ato
GOLGA7	Unkn-05	ato	22.819		ACTIN	Unkn-23	ato	18.3148		GOLGA7	Unkn-01	con	22.6995		ACTIN	Unkn-19	con	17.8367		-0.358657	0.358657	1.28223	ato
GOLGA7	Unkn-05	ato	22.8677		ACTIN	Unkn-23	ato	18.405		GOLGA7	Unkn-01	con	22.6995		ACTIN	Unkn-19	con	17.8367		-0.400096	0.400096	1.3196	ato
GOLGA7	Unkn-13	ato+gsk	23.7731		ACTIN	Unkn-31	ato+gsk	18.9273		GOLGA7	Unkn-01	con	22.6995		ACTIN	Unkn-19	con	17.8367		-0.0169972	0.0169972	1.01185	ato+gsk
GOLGA7	Unkn-13	ato+gsk	24.2751		ACTIN	Unkn-31	ato+gsk	19.0298		GOLGA7	Unkn-01	con	22.6995		ACTIN	Unkn-19	con	17.8367		0.382421	-0.382421	0.767149	ato+gsk
GOLGA7	Unkn-13	ato+gsk	24.3134		ACTIN	Unkn-31	ato+gsk	19.0525		GOLGA7	Unkn-01	con	22.6995		ACTIN	Unkn-19	con	17.8367		0.398028	-0.398028	0.758895	ato+gsk
GOLGA7	Unkn-01	con	22.6097		ACTIN	Unkn-19	con	17.4558		GOLGA7	Unkn-01	con	22.6995		ACTIN	Unkn-19	con	17.8367		0.291064	-0.291064	0.817299	con
GOLGA7	Unkn-01	con	22.6097		ACTIN	Unkn-19	con	17.9847		GOLGA7	Unkn-01	con	22.6995		ACTIN	Unkn-19	con	17.8367		-0.237815	0.237815	1.17921	con
GOLGA7	Unkn-01	con	22.8791		ACTIN	Unkn-19	con	18.0695		GOLGA7	Unkn-01	con	22.6995		ACTIN	Unkn-19	con	17.8367		-0.0532499	0.0532499	1.0376	con
GOLGA7	Unkn-09	gsk	22.4054		ACTIN	Unkn-27	gsk	17.0015		GOLGA7	Unkn-01	con	22.6995		ACTIN	Unkn-19	con	17.8367		0.541005	-0.541005	0.687292	gsk
GOLGA7	Unkn-09	gsk	22.6038		ACTIN	Unkn-27	gsk	17.3127		GOLGA7	Unkn-01	con	22.6995		ACTIN	Unkn-19	con	17.8367		0.428258	-0.428258	0.743159	gsk
GOLGA7	Unkn-09	gsk	22.8536		ACTIN	Unkn-27	gsk	17.3446		GOLGA7	Unkn-01	con	22.6995		ACTIN	Unkn-19	con	17.8367		0.646177	-0.646177	0.638971	gsk
LYPLA1	Unkn-21	ato	21.1079		ACTIN	Unkn-23	ato	18.2203		LYPLA1	Unkn-17	con	20.9112		ACTIN	Unkn-19	con	17.8367		-0.186868	0.186868	1.13829	ato
LYPLA1	Unkn-21	ato	21.1964		ACTIN	Unkn-23	ato	18.3148		LYPLA1	Unkn-17	con	20.9112		ACTIN	Unkn-19	con	17.8367		-0.192962	0.192962	1.14311	ato
LYPLA1	Unkn-21	ato	21.5851		ACTIN	Unkn-23	ato	18.405		LYPLA1	Unkn-17	con	20.9112		ACTIN	Unkn-19	con	17.8367		0.105569	-0.105569	0.929438	ato
LYPLA1	Unkn-29	ato+gsk	22.8122		ACTIN	Unkn-31	ato+gsk	18.9273		LYPLA1	Unkn-17	con	20.9112		ACTIN	Unkn-19	con	17.8367		0.810395	-0.810395	0.570226	ato+gsk
LYPLA1	Unkn-29	ato+gsk	22.82		ACTIN	Unkn-31	ato+gsk	19.0298		LYPLA1	Unkn-17	con	20.9112		ACTIN	Unkn-19	con	17.8367		0.71557	-0.71557	0.608965	ato+gsk
LYPLA1	Unkn-29	ato+gsk	23.3899		ACTIN	Unkn-31	ato+gsk	19.0525		LYPLA1	Unkn-17	con	20.9112		ACTIN	Unkn-19	con	17.8367		1.26287	-1.26287	0.416714	ato+gsk
LYPLA1	Unkn-17	con	20.8685		ACTIN	Unkn-19	con	17.4558		LYPLA1	Unkn-17	con	20.9112		ACTIN	Unkn-19	con	17.8367		0.338069	-0.338069	0.791099	con
LYPLA1	Unkn-17	con	20.9006		ACTIN	Unkn-19	con	17.9847		LYPLA1	Unkn-17	con	20.9112		ACTIN	Unkn-19	con	17.8367		-0.158692	0.158692	1.11627	con
LYPLA1	Unkn-17	con	20.9647		ACTIN	Unkn-19	con	18.0695		LYPLA1	Unkn-17	con	20.9112		ACTIN	Unkn-19	con	17.8367		-0.179377	0.179377	1.13239	con
LYPLA1	Unkn-25	gsk	20.9076		ACTIN	Unkn-27	gsk	17.0015		LYPLA1	Unkn-17	con	20.9112		ACTIN	Unkn-19	con	17.8367		0.831454	-0.831454	0.561962	gsk
LYPLA1	Unkn-25	gsk	21.0389		ACTIN	Unkn-27	gsk	17.3127		LYPLA1	Unkn-17	con	20.9112		ACTIN	Unkn-19	con	17.8367		0.651551	-0.651551	0.636595	gsk
LYPLA1	Unkn-25	gsk	21.0623		ACTIN	Unkn-27	gsk	17.3446		LYPLA1	Unkn-17	con	20.9112		ACTIN	Unkn-19	con	17.8367		0.643091	-0.643091	0.64034	gsk
LYPLA2	Unkn-22	ato	24.3013		ACTIN	Unkn-23	ato	18.2203		LYPLA2	Unkn-18	con	23.9667		ACTIN	Unkn-19	con	17.8367		-0.0488934	0.0488934	1.03447	ato
LYPLA2	Unkn-22	ato	24.5309		ACTIN	Unkn-23	ato	18.3148		LYPLA2	Unkn-18	con	23.9667		ACTIN	Unkn-19	con	17.8367		0.0861671	-0.0861671	0.942022	ato
LYPLA2	Unkn-22	ato	24.5399		ACTIN	Unkn-23	ato	18.405		LYPLA2	Unkn-18	con	23.9667		ACTIN	Unkn-19	con	17.8367		0.0049959	-0.0049959	0.996543	ato
LYPLA2	Unkn-30	ato+gsk	25.197		ACTIN	Unkn-31	ato+gsk	18.9273		LYPLA2	Unkn-18	con	23.9667		ACTIN	Unkn-19	con	17.8367		0.139811	-0.139811	0.907638	ato+gsk
LYPLA2	Unkn-30	ato+gsk	25.1974		ACTIN	Unkn-31	ato+gsk	19.0298		LYPLA2	Unkn-18	con	23.9667		ACTIN	Unkn-19	con	17.8367		0.0375746	-0.0375746	0.974292	ato+gsk
LYPLA2	Unkn-30	ato+gsk	25.281		ACTIN	Unkn-31	ato+gsk	19.0525		LYPLA2	Unkn-18	con	23.9667		ACTIN	Unkn-19	con	17.8367		0.0985269	-0.0985269	0.933986	ato+gsk
LYPLA2	Unkn-18	con	23.9294		ACTIN	Unkn-19	con	17.4558		LYPLA2	Unkn-18	con	23.9667		ACTIN	Unkn-19	con	17.8367		0.343612	-0.343612	0.788066	con
LYPLA2	Unkn-18	con	23.9741		ACTIN	Unkn-19	con	17.9847		LYPLA2	Unkn-18	con	23.9667		ACTIN	Unkn-19	con	17.8367		-0.140553	0.140553	1.10233	con
LYPLA2	Unkn-18	con	23.9964		ACTIN	Unkn-19	con	18.0695		LYPLA2	Unkn-18	con	23.9667		ACTIN	Unkn-19	con	17.8367		-0.203059	0.203059	1.15114	con
LYPLA2	Unkn-26	gsk	23.3679		ACTIN	Unkn-27	gsk	17.0015		LYPLA2	Unkn-18	con	23.9667		ACTIN	Unkn-19	con	17.8367		0.236439	-0.236439	0.848838	gsk
LYPLA2	Unkn-26	gsk	23.8106		ACTIN	Unkn-27	gsk	17.3127		LYPLA2	Unkn-18	con	23.9667		ACTIN	Unkn-19	con	17.8367		0.367853	-0.367853	0.774935	gsk
LYPLA2	Unkn-26	gsk	23.8139		ACTIN	Unkn-27	gsk	17.3446		LYPLA2	Unkn-18	con	23.9667		ACTIN	Unkn-19	con	17.8367		0.339328	-0.339328	0.79041	gsk
ZDHHC17	Unkn-07	ato	25.1212		ACTIN	Unkn-23	ato	18.2203		ZDHHC17	Unkn-03	con	25.1746		ACTIN	Unkn-19	con	17.8367		-0.437008	0.437008	1.35379	ato
ZDHHC17	Unkn-07	ato	25.1904		ACTIN	Unkn-23	ato	18.3148		ZDHHC17	Unkn-03	con	25.1746		ACTIN	Unkn-19	con	17.8367		-0.462299	0.462299	1.37774	ato
ZDHHC17	Unkn-07	ato	25.2769		ACTIN	Unkn-23	ato	18.405		ZDHHC17	Unkn-03	con	25.1746		ACTIN	Unkn-19	con	17.8367		-0.465994	0.465994	1.38127	ato
ZDHHC17	Unkn-15	ato+gsk	27.0152		ACTIN	Unkn-31	ato+gsk	18.9273		ZDHHC17	Unkn-03	con	25.1746		ACTIN	Unkn-19	con	17.8367		0.749978	-0.749978	0.594612	ato+gsk
ZDHHC17	Unkn-15	ato+gsk	27.0266		ACTIN	Unkn-31	ato+gsk	19.0298		ZDHHC17	Unkn-03	con	25.1746		ACTIN	Unkn-19	con	17.8367		0.658854	-0.658854	0.633381	ato+gsk
ZDHHC17	Unkn-15	ato+gsk	27.0573		ACTIN	Unkn-31	ato+gsk	19.0525		ZDHHC17	Unkn-03	con	25.1746		ACTIN	Unkn-19	con	17.8367		0.66689	-0.66689	0.629863	ato+gsk
ZDHHC17	Unkn-03	con	25.0662		ACTIN	Unkn-19	con	17.4558		ZDHHC17	Unkn-03	con	25.1746		ACTIN	Unkn-19	con	17.8367		0.272471	-0.272471	0.827901	con
ZDHHC17	Unkn-03	con	25.1504		ACTIN	Unkn-19	con	17.9847		ZDHHC17	Unkn-03	con	25.1746		ACTIN	Unkn-19	con	17.8367		-0.172285	0.172285	1.12684	con
ZDHHC17	Unkn-03	con	25.3073		ACTIN	Unkn-19	con	18.0695		ZDHHC17	Unkn-03	con	25.1746		ACTIN	Unkn-19	con	17.8367		-0.100185	0.100185	1.07191	con
ZDHHC17	Unkn-11	gsk	24.8917		ACTIN	Unkn-27	gsk	17.0015		ZDHHC17	Unkn-03	con	25.1746		ACTIN	Unkn-19	con	17.8367		0.552191	-0.552191	0.681984	gsk
ZDHHC17	Unkn-11	gsk	24.9389		ACTIN	Unkn-27	gsk	17.3127		ZDHHC17	Unkn-03	con	25.1746		ACTIN	Unkn-19	con	17.8367		0.288238	-0.288238	0.818902	gsk
ZDHHC17	Unkn-11	gsk	25.015		ACTIN	Unkn-27	gsk	17.3446		ZDHHC17	Unkn-03	con	25.1746		ACTIN	Unkn-19	con	17.8367		0.332394	-0.332394	0.794218	gsk
ZDHHC18	Unkn-06	ato	25.3266		ACTIN	Unkn-23	ato	18.2203		ZDHHC18	Unkn-02	con	25.5797		ACTIN	Unkn-19	con	17.8367		-0.636687	0.636687	1.55475	ato
ZDHHC18	Unkn-06	ato	25.4095		ACTIN	Unkn-23	ato	18.3148		ZDHHC18	Unkn-02	con	25.5797		ACTIN	Unkn-19	con	17.8367		-0.648322	0.648322	1.56734	ato
ZDHHC18	Unkn-06	ato	25.6155		ACTIN	Unkn-23	ato	18.405		ZDHHC18	Unkn-02	con	25.5797		ACTIN	Unkn-19	con	17.8367		-0.532452	0.532452	1.44639	ato
ZDHHC18	Unkn-14	ato+gsk	28.4158		ACTIN	Unkn-31	ato+gsk	18.9273		ZDHHC18	Unkn-02	con	25.5797		ACTIN	Unkn-19	con	17.8367		1.74552	-1.74552	0.298226	ato+gsk
ZDHHC18	Unkn-14	ato+gsk	28.6214		ACTIN	Unkn-31	ato+gsk	19.0298		ZDHHC18	Unkn-02	con	25.5797		ACTIN	Unkn-19	con	17.8367		1.84858	-1.84858	0.277666	ato+gsk
ZDHHC18	Unkn-14	ato+gsk	28.8246		ACTIN	Unkn-31	ato+gsk	19.0525		ZDHHC18	Unkn-02	con	25.5797		ACTIN	Unkn-19	con	17.8367		2.02907	-2.02907	0.245014	ato+gsk
ZDHHC18	Unkn-02	con	25.4949		ACTIN	Unkn-19	con	17.4558		ZDHHC18	Unkn-02	con	25.5797		ACTIN	Unkn-19	con	17.8367		0.296027	-0.296027	0.814492	con
ZDHHC18	Unkn-02	con	25.5564		ACTIN	Unkn-19	con	17.9847		ZDHHC18	Unkn-02	con	25.5797		ACTIN	Unkn-19	con	17.8367		-0.171386	0.171386	1.12614	con
ZDHHC18	Unkn-02	con	25.6879		ACTIN	Unkn-19	con	18.0695		ZDHHC18	Unkn-02	con	25.5797		ACTIN	Unkn-19	con	17.8367		-0.124641	0.124641	1.09024	con
ZDHHC18	Unkn-10	gsk	25.4752		ACTIN	Unkn-27	gsk	17.0015		ZDHHC18	Unkn-02	con	25.5797		ACTIN	Unkn-19	con	17.8367		0.730652	-0.730652	0.602631	gsk
ZDHHC18	Unkn-10	gsk	25.503		ACTIN	Unkn-27	gsk	17.3127		ZDHHC18	Unkn-02	con	25.5797		ACTIN	Unkn-19	con	17.8367		0.447189	-0.447189	0.733471	gsk
ZDHHC18	Unkn-10	gsk	25.7647		ACTIN	Unkn-27	gsk	17.3446		ZDHHC18	Unkn-02	con	25.5797		ACTIN	Unkn-19	con	17.8367		0.677028	-0.677028	0.625452	gsk
ZDHHC9	Unkn-08	ato	25.2493		ACTIN	Unkn-23	ato	18.2203		ZDHHC9	Unkn-04	con	24.9832		ACTIN	Unkn-19	con	17.8367		-0.117433	0.117433	1.0848	ato
ZDHHC9	Unkn-08	ato	25.2571		ACTIN	Unkn-23	ato	18.3148		ZDHHC9	Unkn-04	con	24.9832		ACTIN	Unkn-19	con	17.8367		-0.204111	0.204111	1.15198	ato
ZDHHC9	Unkn-08	ato	25.2896		ACTIN	Unkn-23	ato	18.405		ZDHHC9	Unkn-04	con	24.9832		ACTIN	Unkn-19	con	17.8367		-0.261841	0.261841	1.19901	ato
ZDHHC9	Unkn-16	ato+gsk	25.8647		ACTIN	Unkn-31	ato+gsk	18.9273		ZDHHC9	Unkn-04	con	24.9832		ACTIN	Unkn-19	con	17.8367		-0.209	0.209	1.15589	ato+gsk
ZDHHC9	Unkn-16	ato+gsk	25.8944		ACTIN	Unkn-31	ato+gsk	19.0298		ZDHHC9	Unkn-04	con	24.9832		ACTIN	Unkn-19	con	17.8367		-0.281889	0.281889	1.21579	ato+gsk
ZDHHC9	Unkn-16	ato+gsk	26.4998		ACTIN	Unkn-31	ato+gsk	19.0525		ZDHHC9	Unkn-04	con	24.9832		ACTIN	Unkn-19	con	17.8367		0.300802	-0.300802	0.811801	ato+gsk
ZDHHC9	Unkn-04	con	24.7585		ACTIN	Unkn-19	con	17.4558		ZDHHC9	Unkn-04	con	24.9832		ACTIN	Unkn-19	con	17.8367		0.156155	-0.156155	0.897413	con
ZDHHC9	Unkn-04	con	25.0036		ACTIN	Unkn-19	con	17.9847		ZDHHC9	Unkn-04	con	24.9832		ACTIN	Unkn-19	con	17.8367		-0.127637	0.127637	1.0925	con
ZDHHC9	Unkn-04	con	25.1875		ACTIN	Unkn-19	con	18.0695		ZDHHC9	Unkn-04	con	24.9832		ACTIN	Unkn-19	con	17.8367		-0.028518	0.028518	1.01996	con
ZDHHC9	Unkn-12	gsk	24.3426		ACTIN	Unkn-27	gsk	17.0015		ZDHHC9	Unkn-04	con	24.9832		ACTIN	Unkn-19	con	17.8367		0.194587	-0.194587	0.873823	gsk
ZDHHC9	Unkn-12	gsk	24.4033		ACTIN	Unkn-27	gsk	17.3127		ZDHHC9	Unkn-04	con	24.9832		ACTIN	Unkn-19	con	17.8367		-0.0559451	0.0559451	1.03954	gsk
ZDHHC9	Unkn-12	gsk	24.4335		ACTIN	Unkn-27	gsk	17.3446		ZDHHC9	Unkn-04	con	24.9832		ACTIN	Unkn-19	con	17.8367		-0.0575779	0.0575779	1.04072	gsk

## Sheet: Sheet2
GOLGA7	Unkn-05	ato	22.6889		18S	Unkn-24	ato	11.658		GOLGA7	Unkn-01	con	22.6995		18S	Unkn-20	con	11.8731		0.204559	-0.204559	0.867804	ato
GOLGA7	Unkn-05	ato	22.819		18S	Unkn-24	ato	11.7236		GOLGA7	Unkn-01	con	22.6995		18S	Unkn-20	con	11.8731		0.269001	-0.269001	0.829894	ato
GOLGA7	Unkn-05	ato	22.8677		18S	Unkn-24	ato	11.8523		GOLGA7	Unkn-01	con	22.6995		18S	Unkn-20	con	11.8731		0.189041	-0.189041	0.877188	ato
GOLGA7	Unkn-13	ato+gsk	23.7731		18S	Unkn-32	ato+gsk	14.4349		GOLGA7	Unkn-01	con	22.6995		18S	Unkn-20	con	11.8731		-1.48815	1.48815	2.8053	ato+gsk
GOLGA7	Unkn-13	ato+gsk	24.2751		18S	Unkn-32	ato+gsk	14.6345		GOLGA7	Unkn-01	con	22.6995		18S	Unkn-20	con	11.8731		-1.18576	1.18576	2.27484	ato+gsk
GOLGA7	Unkn-13	ato+gsk	24.3134		18S	Unkn-32	ato+gsk	14.865		GOLGA7	Unkn-01	con	22.6995		18S	Unkn-20	con	11.8731		-1.37804	1.37804	2.59914	ato+gsk
GOLGA7	Unkn-01	con	22.6097		18S	Unkn-20	con	11.5556		GOLGA7	Unkn-01	con	22.6995		18S	Unkn-20	con	11.8731		0.227744	-0.227744	0.853969	con
GOLGA7	Unkn-01	con	22.6097		18S	Unkn-20	con	11.9683		GOLGA7	Unkn-01	con	22.6995		18S	Unkn-20	con	11.8731		-0.18494	0.18494	1.13677	con
GOLGA7	Unkn-01	con	22.8791		18S	Unkn-20	con	12.0955		GOLGA7	Unkn-01	con	22.6995		18S	Unkn-20	con	11.8731		-0.0428042	0.0428042	1.03011	con
GOLGA7	Unkn-09	gsk	22.4054		18S	Unkn-28	gsk	11.3983		GOLGA7	Unkn-01	con	22.6995		18S	Unkn-20	con	11.8731		0.180726	-0.180726	0.882259	gsk
GOLGA7	Unkn-09	gsk	22.6038		18S	Unkn-28	gsk	11.4326		GOLGA7	Unkn-01	con	22.6995		18S	Unkn-20	con	11.8731		0.344884	-0.344884	0.787371	gsk
GOLGA7	Unkn-09	gsk	22.8536		18S	Unkn-28	gsk	11.6152		GOLGA7	Unkn-01	con	22.6995		18S	Unkn-20	con	11.8731		0.412046	-0.412046	0.751557	gsk
LYPLA1	Unkn-21	ato	21.1079		18S	Unkn-24	ato	11.658		LYPLA1	Unkn-17	con	20.9112		18S	Unkn-20	con	11.8731		0.411842	-0.411842	0.751663	ato
LYPLA1	Unkn-21	ato	21.1964		18S	Unkn-24	ato	11.7236		LYPLA1	Unkn-17	con	20.9112		18S	Unkn-20	con	11.8731		0.434696	-0.434696	0.739849	ato
LYPLA1	Unkn-21	ato	21.5851		18S	Unkn-24	ato	11.8523		LYPLA1	Unkn-17	con	20.9112		18S	Unkn-20	con	11.8731		0.694705	-0.694705	0.617835	ato
LYPLA1	Unkn-29	ato+gsk	22.8122		18S	Unkn-32	ato+gsk	14.4349		LYPLA1	Unkn-17	con	20.9112		18S	Unkn-20	con	11.8731		-0.660763	0.660763	1.58092	ato+gsk
LYPLA1	Unkn-29	ato+gsk	22.82		18S	Unkn-32	ato+gsk	14.6345		LYPLA1	Unkn-17	con	20.9112		18S	Unkn-20	con	11.8731		-0.852616	0.852616	1.80577	ato+gsk
LYPLA1	Unkn-29	ato+gsk	23.3899		18S	Unkn-32	ato+gsk	14.865		LYPLA1	Unkn-17	con	20.9112		18S	Unkn-20	con	11.8731		-0.513192	0.513192	1.4272	ato+gsk
LYPLA1	Unkn-17	con	20.8685		18S	Unkn-20	con	11.5556		LYPLA1	Unkn-17	con	20.9112		18S	Unkn-20	con	11.8731		0.274749	-0.274749	0.826594	con
LYPLA1	Unkn-17	con	20.9006		18S	Unkn-20	con	11.9683		LYPLA1	Unkn-17	con	20.9112		18S	Unkn-20	con	11.8731		-0.105818	0.105818	1.0761	con
LYPLA1	Unkn-17	con	20.9647		18S	Unkn-20	con	12.0955		LYPLA1	Unkn-17	con	20.9112		18S	Unkn-20	con	11.8731		-0.168931	0.168931	1.12423	con
LYPLA1	Unkn-25	gsk	20.9076		18S	Unkn-28	gsk	11.3983		LYPLA1	Unkn-17	con	20.9112		18S	Unkn-20	con	11.8731		0.471175	-0.471175	0.721377	gsk
LYPLA1	Unkn-25	gsk	21.0389		18S	Unkn-28	gsk	11.4326		LYPLA1	Unkn-17	con	20.9112		18S	Unkn-20	con	11.8731		0.568178	-0.568178	0.674468	gsk
LYPLA1	Unkn-25	gsk	21.0623		18S	Unkn-28	gsk	11.6152		LYPLA1	Unkn-17	con	20.9112		18S	Unkn-20	con	11.8731		0.40896	-0.40896	0.753166	gsk
LYPLA2	Unkn-22	ato	24.3013		18S	Unkn-24	ato	11.658		LYPLA2	Unkn-18	con	23.9667		18S	Unkn-20	con	11.8731		0.549816	-0.549816	0.683107	ato
LYPLA2	Unkn-22	ato	24.5309		18S	Unkn-24	ato	11.7236		LYPLA2	Unkn-18	con	23.9667		18S	Unkn-20	con	11.8731		0.713825	-0.713825	0.609701	ato
LYPLA2	Unkn-22	ato	24.5399		18S	Unkn-24	ato	11.8523		LYPLA2	Unkn-18	con	23.9667		18S	Unkn-20	con	11.8731		0.594133	-0.594133	0.662443	ato
LYPLA2	Unkn-30	ato+gsk	25.197		18S	Unkn-32	ato+gsk	14.4349		LYPLA2	Unkn-18	con	23.9667		18S	Unkn-20	con	11.8731		-1.33135	1.33135	2.51637	ato+gsk
LYPLA2	Unkn-30	ato+gsk	25.1974		18S	Unkn-32	ato+gsk	14.6345		LYPLA2	Unkn-18	con	23.9667		18S	Unkn-20	con	11.8731		-1.53061	1.53061	2.88908	ato+gsk
LYPLA2	Unkn-30	ato+gsk	25.281		18S	Unkn-32	ato+gsk	14.865		LYPLA2	Unkn-18	con	23.9667		18S	Unkn-20	con	11.8731		-1.67754	1.67754	3.19881	ato+gsk
LYPLA2	Unkn-18	con	23.9294		18S	Unkn-20	con	11.5556		LYPLA2	Unkn-18	con	23.9667		18S	Unkn-20	con	11.8731		0.280292	-0.280292	0.823425	con
LYPLA2	Unkn-18	con	23.9741		18S	Unkn-20	con	11.9683		LYPLA2	Unkn-18	con	23.9667		18S	Unkn-20	con	11.8731		-0.0876785	0.0876785	1.06266	con
LYPLA2	Unkn-18	con	23.9964		18S	Unkn-20	con	12.0955		LYPLA2	Unkn-18	con	23.9667		18S	Unkn-20	con	11.8731		-0.192613	0.192613	1.14283	con
LYPLA2	Unkn-26	gsk	23.3679		18S	Unkn-28	gsk	11.3983		LYPLA2	Unkn-18	con	23.9667		18S	Unkn-20	con	11.8731		-0.12384	0.12384	1.08963	gsk
LYPLA2	Unkn-26	gsk	23.8106		18S	Unkn-28	gsk	11.4326		LYPLA2	Unkn-18	con	23.9667		18S	Unkn-20	con	11.8731		0.284479	-0.284479	0.821038	gsk
LYPLA2	Unkn-26	gsk	23.8139		18S	Unkn-28	gsk	11.6152		LYPLA2	Unkn-18	con	23.9667		18S	Unkn-20	con	11.8731		0.105196	-0.105196	0.929678	gsk
ZDHHC17	Unkn-07	ato	25.1212		18S	Unkn-24	ato	11.658		ZDHHC17	Unkn-03	con	25.1746		18S	Unkn-20	con	11.8731		0.161702	-0.161702	0.89397	ato
ZDHHC17	Unkn-07	ato	25.1904		18S	Unkn-24	ato	11.7236		ZDHHC17	Unkn-03	con	25.1746		18S	Unkn-20	con	11.8731		0.165359	-0.165359	0.891707	ato
ZDHHC17	Unkn-07	ato	25.2769		18S	Unkn-24	ato	11.8523		ZDHHC17	Unkn-03	con	25.1746		18S	Unkn-20	con	11.8731		0.123143	-0.123143	0.918185	ato
ZDHHC17	Unkn-15	ato+gsk	27.0152		18S	Unkn-32	ato+gsk	14.4349		ZDHHC17	Unkn-03	con	25.1746		18S	Unkn-20	con	11.8731		-0.721179	0.721179	1.64853	ato+gsk
ZDHHC17	Unkn-15	ato+gsk	27.0266		18S	Unkn-32	ato+gsk	14.6345		ZDHHC17	Unkn-03	con	25.1746		18S	Unkn-20	con	11.8731		-0.909332	0.909332	1.87818	ato+gsk
ZDHHC17	Unkn-15	ato+gsk	27.0573		18S	Unkn-32	ato+gsk	14.865		ZDHHC17	Unkn-03	con	25.1746		18S	Unkn-20	con	11.8731		-1.10917	1.10917	2.15722	ato+gsk
ZDHHC17	Unkn-03	con	25.0662		18S	Unkn-20	con	11.5556		ZDHHC17	Unkn-03	con	25.1746		18S	Unkn-20	con	11.8731		0.20915	-0.20915	0.865047	con
ZDHHC17	Unkn-03	con	25.1504		18S	Unkn-20	con	11.9683		ZDHHC17	Unkn-03	con	25.1746		18S	Unkn-20	con	11.8731		-0.119411	0.119411	1.08629	con
ZDHHC17	Unkn-03	con	25.3073		18S	Unkn-20	con	12.0955		ZDHHC17	Unkn-03	con	25.1746		18S	Unkn-20	con	11.8731		-0.0897396	0.0897396	1.06418	con
ZDHHC17	Unkn-11	gsk	24.8917		18S	Unkn-28	gsk	11.3983		ZDHHC17	Unkn-03	con	25.1746		18S	Unkn-20	con	11.8731		0.191911	-0.191911	0.875445	gsk
ZDHHC17	Unkn-11	gsk	24.9389		18S	Unkn-28	gsk	11.4326		ZDHHC17	Unkn-03	con	25.1746		18S	Unkn-20	con	11.8731		0.204864	-0.204864	0.86762	gsk
ZDHHC17	Unkn-11	gsk	25.015		18S	Unkn-28	gsk	11.6152		ZDHHC17	Unkn-03	con	25.1746		18S	Unkn-20	con	11.8731		0.0982624	-0.0982624	0.934157	gsk
ZDHHC18	Unkn-06	ato	25.3266		18S	Unkn-24	ato	11.658		ZDHHC18	Unkn-02	con	25.5797		18S	Unkn-20	con	11.8731		-0.0379767	0.0379767	1.02667	ato
ZDHHC18	Unkn-06	ato	25.4095		18S	Unkn-24	ato	11.7236		ZDHHC18	Unkn-02	con	25.5797		18S	Unkn-20	con	11.8731		-0.0206635	0.0206635	1.01443	ato
ZDHHC18	Unkn-06	ato	25.6155		18S	Unkn-24	ato	11.8523		ZDHHC18	Unkn-02	con	25.5797		18S	Unkn-20	con	11.8731		0.0566846	-0.0566846	0.961471	ato
ZDHHC18	Unkn-14	ato+gsk	28.4158		18S	Unkn-32	ato+gsk	14.4349		ZDHHC18	Unkn-02	con	25.5797		18S	Unkn-20	con	11.8731		0.274363	-0.274363	0.826815	ato+gsk
ZDHHC18	Unkn-14	ato+gsk	28.6214		18S	Unkn-32	ato+gsk	14.6345		ZDHHC18	Unkn-02	con	25.5797		18S	Unkn-20	con	11.8731		0.280389	-0.280389	0.823369	ato+gsk
ZDHHC18	Unkn-14	ato+gsk	28.8246		18S	Unkn-32	ato+gsk	14.865		ZDHHC18	Unkn-02	con	25.5797		18S	Unkn-20	con	11.8731		0.253002	-0.253002	0.839148	ato+gsk
ZDHHC18	Unkn-02	con	25.4949		18S	Unkn-20	con	11.5556		ZDHHC18	Unkn-02	con	25.5797		18S	Unkn-20	con	11.8731		0.232707	-0.232707	0.851037	con
ZDHHC18	Unkn-02	con	25.5564		18S	Unkn-20	con	11.9683		ZDHHC18	Unkn-02	con	25.5797		18S	Unkn-20	con	11.8731		-0.118512	0.118512	1.08561	con
ZDHHC18	Unkn-02	con	25.6879		18S	Unkn-20	con	12.0955		ZDHHC18	Unkn-02	con	25.5797		18S	Unkn-20	con	11.8731		-0.114195	0.114195	1.08237	con
ZDHHC18	Unkn-10	gsk	25.4752		18S	Unkn-28	gsk	11.3983		ZDHHC18	Unkn-02	con	25.5797		18S	Unkn-20	con	11.8731		0.370373	-0.370373	0.773583	gsk
ZDHHC18	Unkn-10	gsk	25.503		18S	Unkn-28	gsk	11.4326		ZDHHC18	Unkn-02	con	25.5797		18S	Unkn-20	con	11.8731		0.363815	-0.363815	0.777107	gsk
ZDHHC18	Unkn-10	gsk	25.7647		18S	Unkn-28	gsk	11.6152		ZDHHC18	Unkn-02	con	25.5797		18S	Unkn-20	con	11.8731		0.442897	-0.442897	0.735656	gsk
ZDHHC9	Unkn-08	ato	25.2493		18S	Unkn-24	ato	11.658		ZDHHC9	Unkn-04	con	24.9832		18S	Unkn-20	con	11.8731		0.481277	-0.481277	0.716343	ato
ZDHHC9	Unkn-08	ato	25.2571		18S	Unkn-24	ato	11.7236		ZDHHC9	Unkn-04	con	24.9832		18S	Unkn-20	con	11.8731		0.423547	-0.423547	0.745589	ato
ZDHHC9	Unkn-08	ato	25.2896		18S	Unkn-24	ato	11.8523		ZDHHC9	Unkn-04	con	24.9832		18S	Unkn-20	con	11.8731		0.327296	-0.327296	0.797029	ato
ZDHHC9	Unkn-16	ato+gsk	25.8647		18S	Unkn-32	ato+gsk	14.4349		ZDHHC9	Unkn-04	con	24.9832		18S	Unkn-20	con	11.8731		-1.68016	1.68016	3.20463	ato+gsk
ZDHHC9	Unkn-16	ato+gsk	25.8944		18S	Unkn-32	ato+gsk	14.6345		ZDHHC9	Unkn-04	con	24.9832		18S	Unkn-20	con	11.8731		-1.85007	1.85007	3.60519	ato+gsk
ZDHHC9	Unkn-16	ato+gsk	26.4998		18S	Unkn-32	ato+gsk	14.865		ZDHHC9	Unkn-04	con	24.9832		18S	Unkn-20	con	11.8731		-1.47526	1.47526	2.78034	ato+gsk
ZDHHC9	Unkn-04	con	24.7585		18S	Unkn-20	con	11.5556		ZDHHC9	Unkn-04	con	24.9832		18S	Unkn-20	con	11.8731		0.092835	-0.092835	0.937678	con
ZDHHC9	Unkn-04	con	25.0036		18S	Unkn-20	con	11.9683		ZDHHC9	Unkn-04	con	24.9832		18S	Unkn-20	con	11.8731		-0.0747628	0.0747628	1.05319	con
ZDHHC9	Unkn-04	con	25.1875		18S	Unkn-20	con	12.0955		ZDHHC9	Unkn-04	con	24.9832		18S	Unkn-20	con	11.8731		-0.0180723	0.0180723	1.01261	con
ZDHHC9	Unkn-12	gsk	24.3426		18S	Unkn-28	gsk	11.3983		ZDHHC9	Unkn-04	con	24.9832		18S	Unkn-20	con	11.8731		-0.165692	0.165692	1.1217	gsk
ZDHHC9	Unkn-12	gsk	24.4033		18S	Unkn-28	gsk	11.4326		ZDHHC9	Unkn-04	con	24.9832		18S	Unkn-20	con	11.8731		-0.139319	0.139319	1.10139	gsk
ZDHHC9	Unkn-12	gsk	24.4335		18S	Unkn-28	gsk	11.6152		ZDHHC9	Unkn-04	con	24.9832		18S	Unkn-20	con	11.8731		-0.291709	0.291709	1.22409	gsk

## Sheet: Run Information
File Name	1.pcrd
Created By User	admin
Notes
ID
Run Started	11/13/2024 02:56:23 UTC
Run Ended	11/13/2024 04:36:40 UTC
Sample Vol	15
Lid Temp	105
Protocol File Name	QHX1.prcl
Plate Setup File Name	1.pltd
Base Serial Number	CT059926
Optical Head Serial Number	785BR31367
CFX Maestro Version	4.1.2433.1219.
